# Supplementary material
Source: Springer Nature journal article supplement (https://www.springermedizin.de/resource/supplementary/12885_2010_2573_MOESM2_ESM.pdf/9462598)

(a)

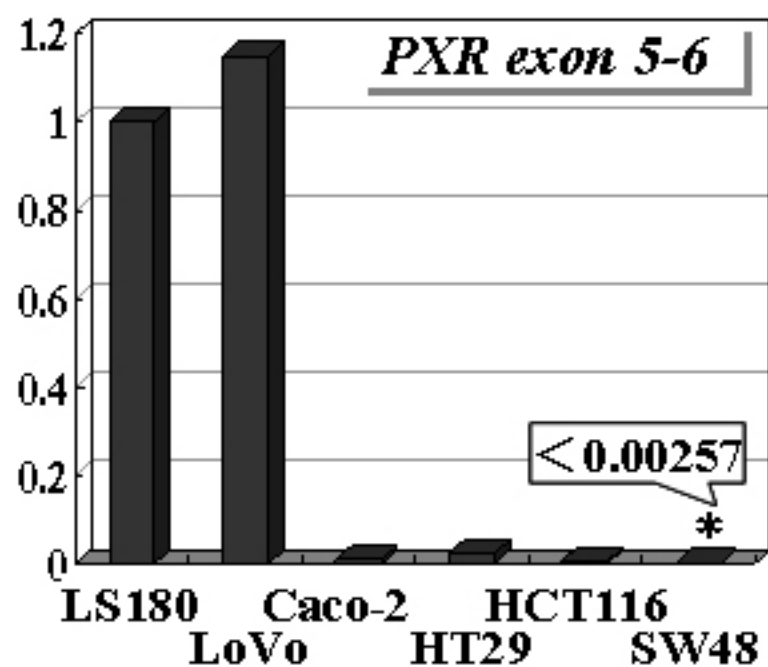

(b)

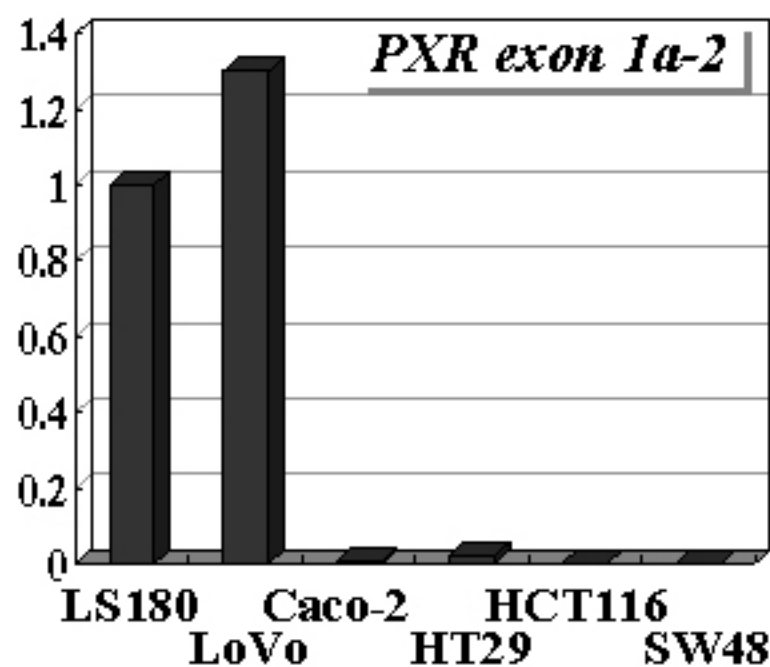

(c)

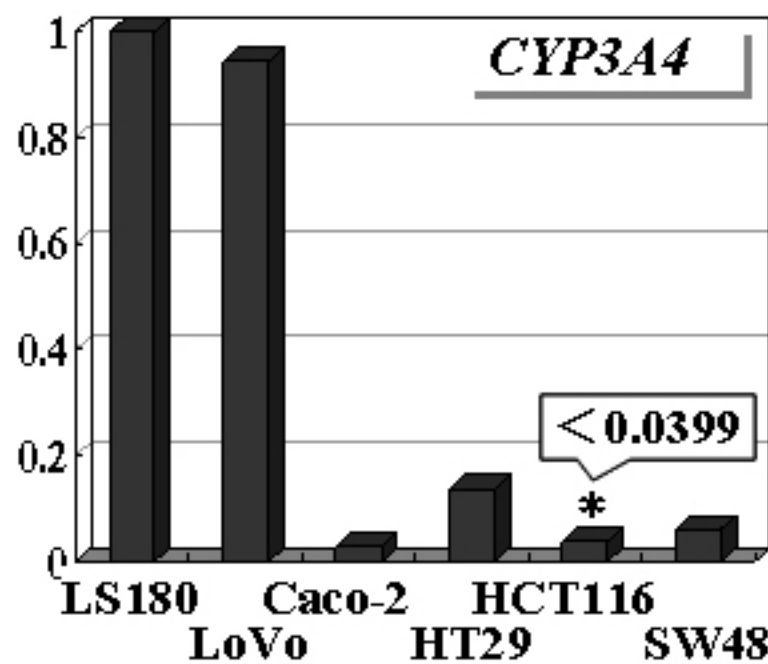

(d)

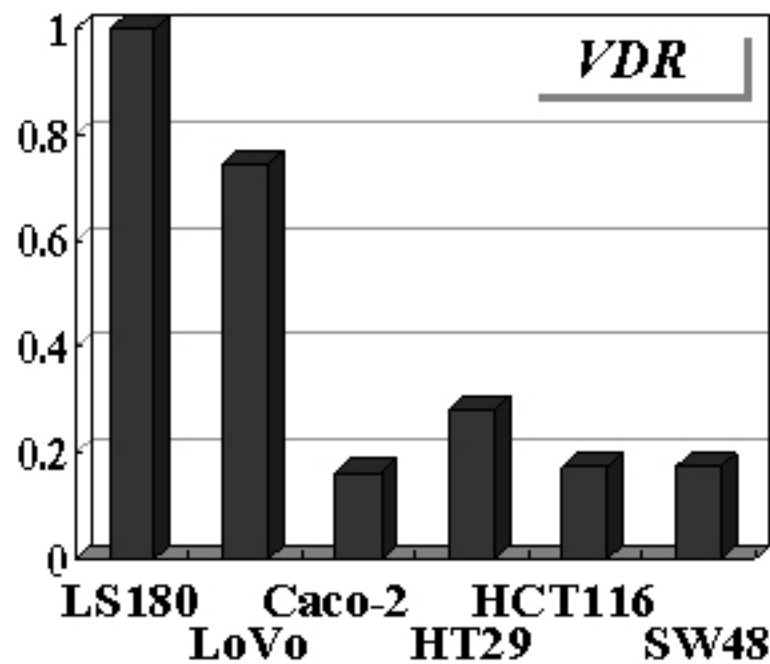

Supplement: MOESM2 [file 9462598]
